# Supplementary material for: Enhanced dielectric and energy storage performance of surface treated gallium ferrite/polyvinylidene fluoride nanocomposites
Source: Royal Society of Chemistry journal article supplement (doi:10.1039/c6ra22939e), 2016-01-01

**Fig.S1** Variation of dielectric constant of GFO-PVDF composites and SGFO-PVDF composites at 10 kHz with with the different wt% loading of nanoparticles.

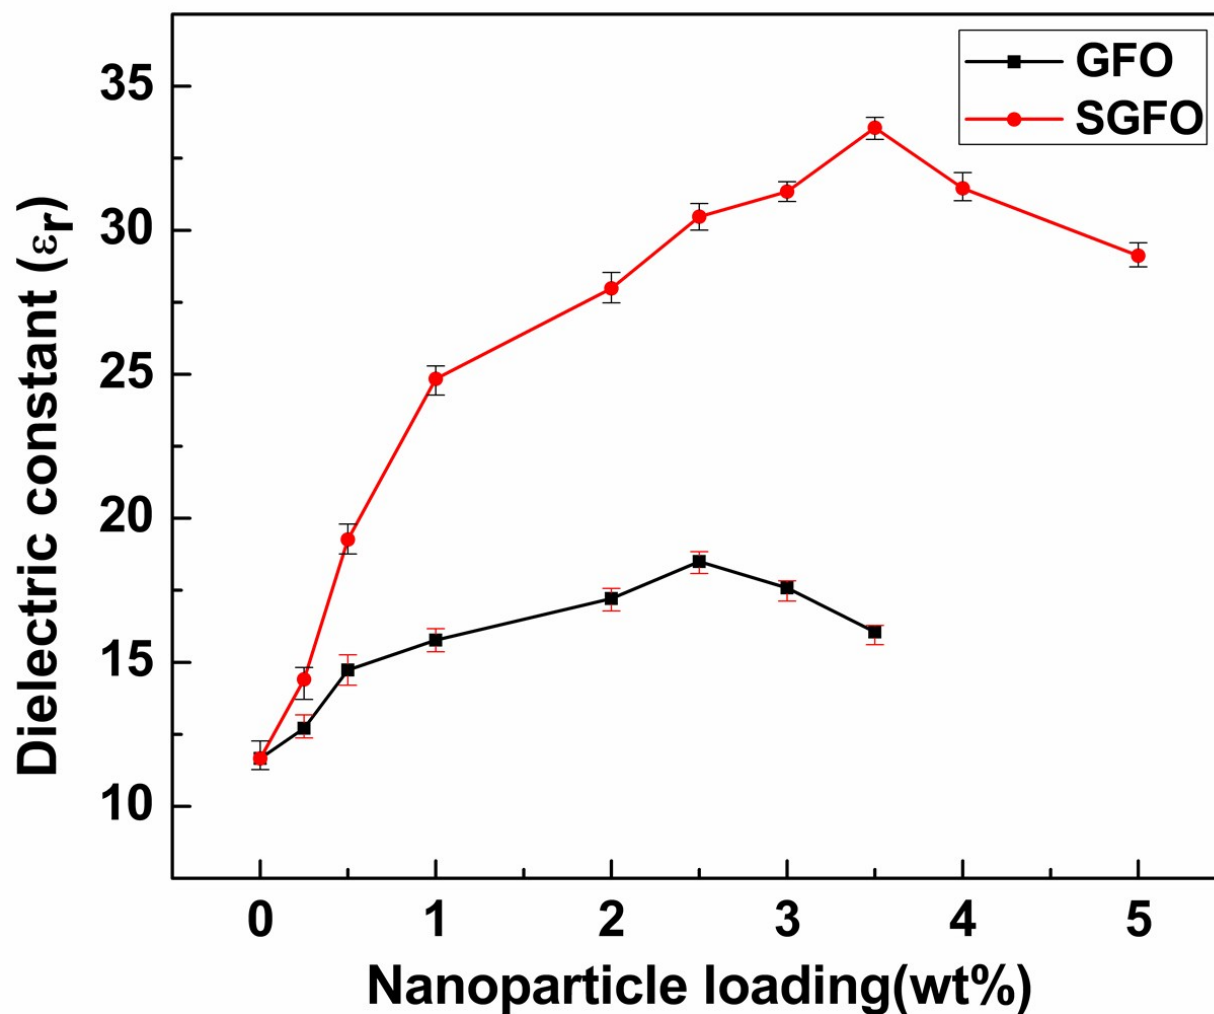

Fig. S2 Variation of breakdown strength GFO-PVDF composites and SGFO-PVDF composites.

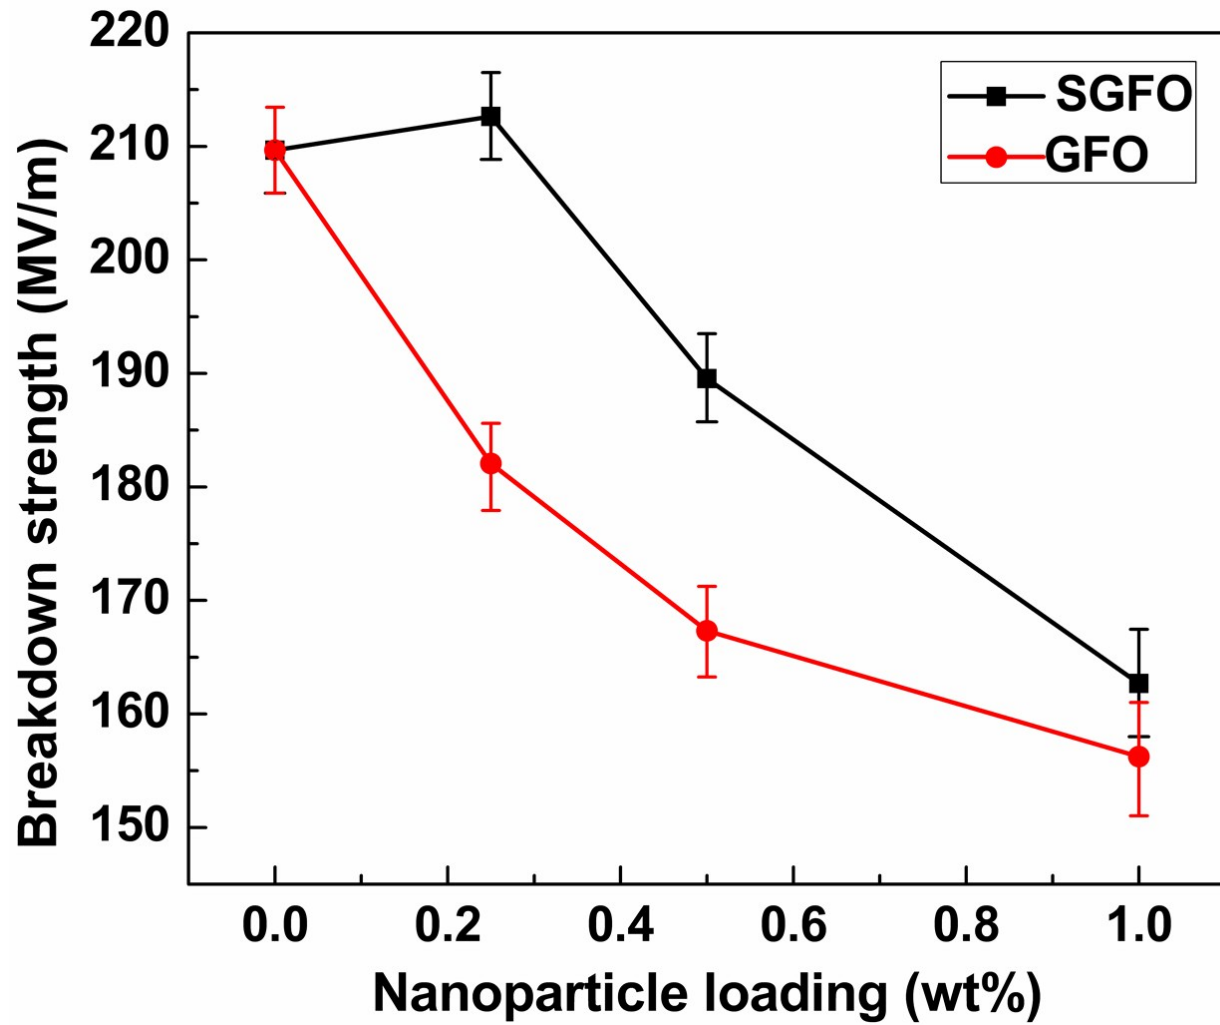

Supplement: c6ra22939e1.pdf [file c6ra22939e1.pdf]
